# Supplementary material for: The Coronavirus Calendar (CoronaCal): a Simplified SARS-CoV-2 Test System for Sampling and Retrospective Analysis
Source: bioRxiv or medRxiv preprint supplement (doi:10.1101/2022.03.03.22271769), 2022-03-04
Supplement: Supplementary file [file media-1.pdf]

SUPPLEMENTARY MATERIAL

**The Coronavirus Calendar (CoronaCal): a Simplified SARS-CoV-2 Test System  
for Sampling and Retrospective Analysis**

David S. Thaler,<sup>1, 2, 3, \*</sup> Manija A. Kazmi,<sup>3, \*</sup> Karina C. Åberg,<sup>3, \*</sup> Jordan M. Mattheisen,<sup>3,4</sup> Thomas Huber,<sup>3</sup> and Thomas P. Sakmar<sup>3</sup>

<sup>1</sup>Biozentrum, University of Basel, CH-4056 Basel, Switzerland

<sup>2</sup>Program for the Human Environment, The Rockefeller University, New York, NY, USA

<sup>3</sup>Laboratory of Chemical Biology and Signal Transduction, The Rockefeller University, New York, NY, USA

<sup>4</sup>Tri-Institutional Program in Chemical Biology, New York, NY USA

\* Authors contributed equally

Corresponding authors: E-mails: [david.thaler@unibas.ch](mailto:david.thaler@unibas.ch), [sakmar@rockefeller.edu](mailto:sakmar@rockefeller.edu)

Keywords:

SARS-CoV-2, COVID-19 saliva test, virus, epidemiology, public health, sample preservation

Running title:

SARS-CoV-2 sample preservation on paper diaries



Supplemental Figure 1. **The CoronaCal diary.** *Upper panel.* CoronaCal collection sheets were printed onto ordinary printer paper. Each 8-1/2" x 11" sheet can accommodate two-weeks of daily samples, and each participant was provided with enough sheets for up to 12 weeks of sampling. *Lower panel.* Covering stickers with a symptom check list were printed on Avery sticker stock. A later version of the symptoms list included "can't smell" and "can't taste." The collection sheet and sticker templates are reduced here from their actual size. Downloadable CoronaCal templates are available [www.CoronaCal.com](http://www.CoronaCal.com) as a supplement.

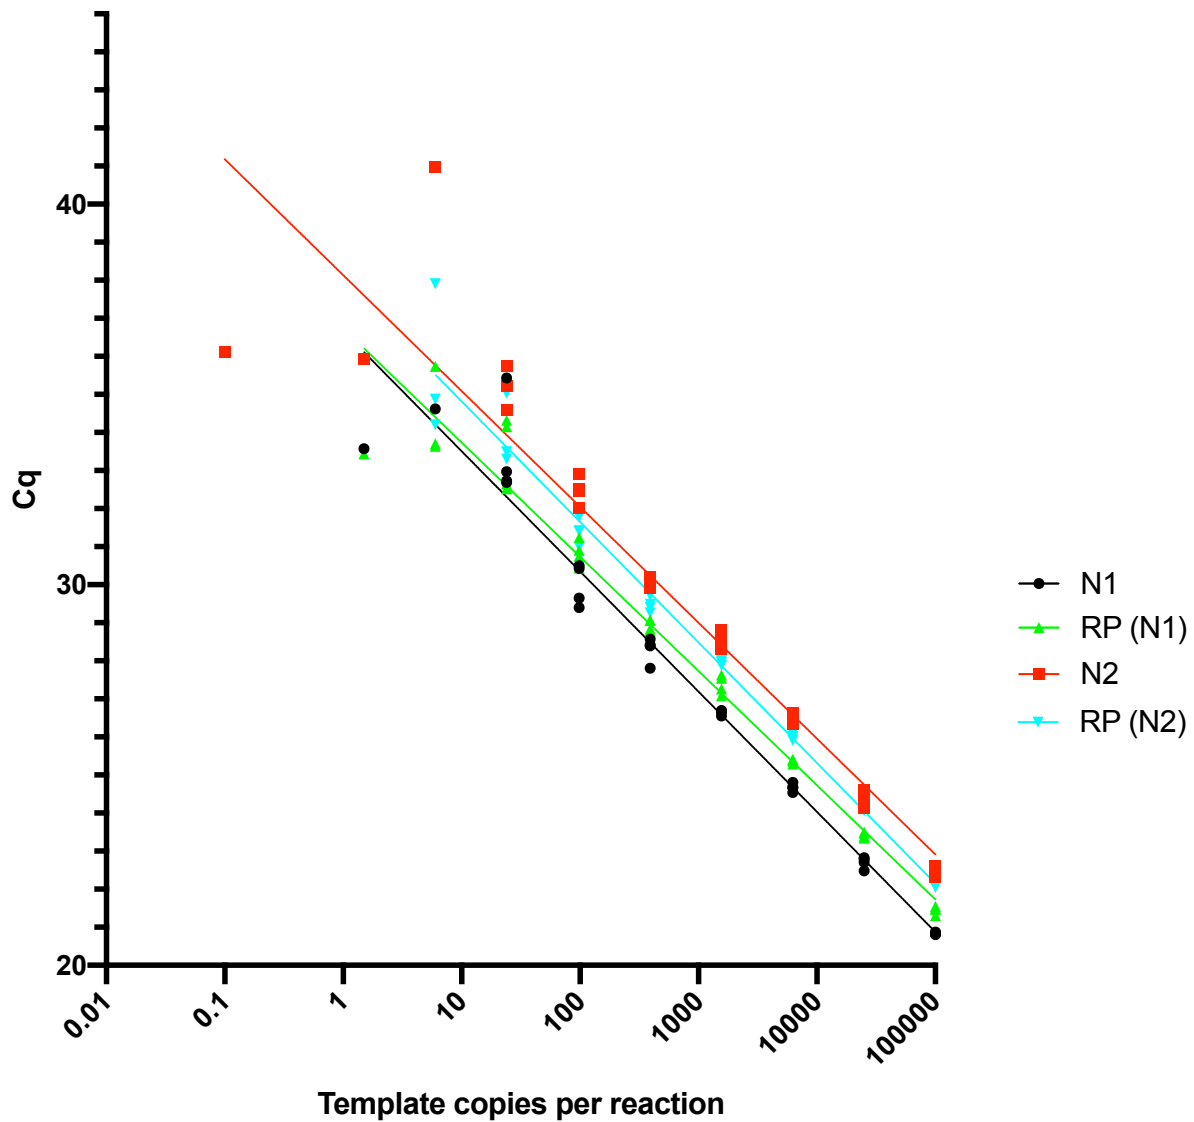

Supplementary Figure 2. **RT-qPCR sensitivity plot.** As described in Materials and Methods the limit of detection and linearity of the SARS-CoV-2 virus assay was tested using the control plasmids IDT 2019 nCoV\_N\_Positive Control and IDT 2019 Hs\_RPP30\_Positive Control. Plasmids were serially diluted from 100,000 copies/rxn down to 0.1 copies/rxn in water and RT-qPCR reactions were set up in triplicate and performed as described to determine the Cq values for each dilution.
